# Supplementary material
Source: PubMed Central journal article supplement (PMC6012705)
Supplement: rsbl20180150supp1.pdf [file rsbl20180150supp1.pdf]

# Evidence for contrasting roles for prolactin in eusocial naked mole-rats, *Heterocephalus glaber* and Damaraland mole-rats, *Fukomys damarensis*

<sup>1</sup>Mammal Research Institute, Department of Zoology and Entomology, University of Pretoria, Pretoria 0002, South Africa

<sup>2</sup>Department of Anatomy and Physiology, University of Pretoria, Onderstepoort 0110, South Africa

<sup>3</sup>Department of Biological Sciences, University of Cape Town, South Africa

<sup>4</sup>Department of Zoology, University of Cambridge

<sup>5</sup>School of Biological and Chemical Sciences, Queen Mary University of London, England

<sup>6</sup>EEMiS, Department of Biology and Environmental Science, Linnaeus University, SE-391 82 Kalmar, Sweden

Correspondence to: Chris G. Faulkes (c.g.faulkes@qmul.ac.uk)

## Supplementary Material

### Methods

#### Animal housing

Animals were briefly housed in their natal colonies in large plastic crates (1m x 0.5m x 0.5m) prior to sampling in the case of DMRs collected from Winton, before being taken to the University of Pretoria (UP). DMRs from the Kalahari Research Centre (KRC) and NMRs at UP and Queen Mary University of London (QMUL) were kept long-term in interconnecting tubing with communal nest, food and toilet chambers - see Tables S1 and S2. Wood shavings, sand and paper towelling served as nesting material. The room temperature ranged between 20 and 28°C (DMRs) and 29 and 30°C (NMRs) with relative humidity around 50-60% (Bennett & Jarvis, 1988; Faulkes *et al.*, 1990, Zöttl *et al.*, 2016). Animal rooms in Pretoria were maintained on a 12L:12D photoperiod, while the KRC and QMUL colonies were kept in the dark, with lights-on while daily husbandry and sampling was conducted. Photoperiod has not been shown to affect DMR and NMR behaviour (C.G. Faulkes and N.C. Bennett, unpublished data; Oosthuizen *et al.*, 2003). Potential effects of the differing photoperiod regimes were tested for in this study, and ruled it out as a significant variable (see results below;  $F=0.560$ ; d.f.= 1, 124;  $p=0.4558$ ). Animals were fed on a variety of chopped vegetables and drank no free water. For both species, reproductive females were identified by the presence of prominent axillary and inguinal teats, well developed external genitalia with a perforate vagina, and/or pregnancy-related changes in girth/body size. Reproductive males were identified on the basis of observations of copulation with the reproductive female (NMRs), while in DMRs a dark stain around the periphery of the mouth and bulging testes which project from abdominal pockets discern dominant breeders. At the KRC records of dyadic behavioural interactions were used to identify socially dominant males.

#### Blood sampling

For NMRs, blood samples were collected between 08h00 and 15h00 as follows: The animals were hand held and venous blood samples collected from the hind foot. Approximately 300-500ul of blood was collected into heparinised micro-haematocrit tubes (University of Pretoria samples) or into a heparinised 1 ml syringe from trunk blood following euthanasia (QMUL) prior to tissue collection for other studies. Similarly, in DMRs, blood was either collected from the foot or trunk blood. All blood samples collected at the University of Pretoria and the KRC were obtained with University of Pretoria ethics committee clearance and at QMUL followed institutional guidelines.

#### Prolactin assay and validation

In brief, 100  $\mu$ l of reference standard and diluted samples (1/2 to 1/50 in sample diluent) were transferred into coated wells of a 96-well micro-ELISA plate, respectively, and incubated for 90 min at 37°C. Subsequently, all supernatant was removed, and the plate patted dry. Immediately, 100  $\mu$ l of biotinylated detection antibody was added, and incubated for 60 min at 37°C. The plate was washed 3 times, patted dry, and 100  $\mu$ l of horse radish peroxidase (HRP) conjugate were added and incubated for 30 min at 37°C. Subsequently, the plate was washed 5 times with wash-buffer, and patted dry. 90  $\mu$ l of substrate reagent were added, and incubated for 15 min at 37°C. To terminate the enzymatic reaction, 50  $\mu$ l of stop solution were added. Optical density was determined at 450 nm and results

calculated using a best fit curve. The sensitivity of the assay was 0.1 ng/ml, the detection range 0.16-10 ng/ml, and coefficient of variation for repeatability was < 10%. Serial dilutions of spiked plasma pools for DMR and NMR gave displacement curves that were parallel to the respective standard curve of the PRL assay, validating the assay for use with both species (relative variation (%) of the slope of respective trend lines <2%; figure S1).

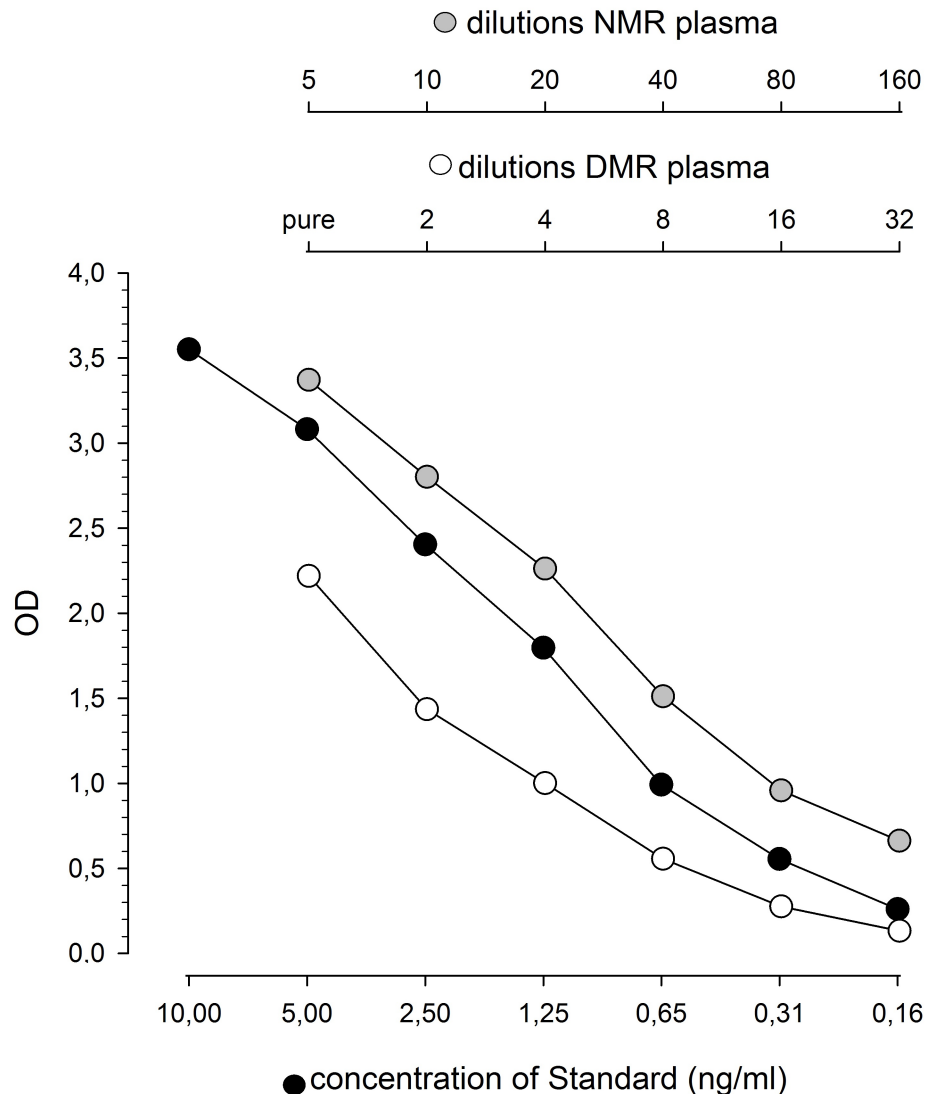

Figure S1: Assay validation revealed by parallelism of serial dilutions of spiked plasma pools for DMR and NMR, with standard for the PRL ELISA assay. Relative variation (%) of the slope of respective trendlines were <2% for DMR and NMR plasma, respectively. OD is the optical density measures the ELISA colour change, which is proportional to the concentration of PRL.

Because this is the first time PRL has been measured in mole-rats, we do not know if measures of hyperprolactinaemia in humans correspond to measures of hyperprolactinaemia in mole rats. We have chosen to include the clinical values in humans as a relevant mammalian benchmark. Normal levels of PRL are by and large similar in other mammals, and less than the benchmark values for hyperprolactinaemia in humans of 25 ng/ml that we use for context. This includes rodents, e.g. rats < 10 ng/ml (controls in Fig 3B in Egli *et al.* 2010), Chinese hamsters < 10 ng/ml, Syrian hamsters < 14 ng/ml (Parkening *et al.*, 1980) and meerkats <12 ng/ml (Carlson *et al.* 2006).

## Statistical analysis

Because of the large number of animals in which prolactin levels were undetectable, and the resulting zeroes in the dataset, we used a Tweedie distribution (Tweedie, 1984) to describe the response distribution within a generalised linear model framework with prolactin levels as the response and species, sex and reproductive status (breeding or non-breeding) as predictors, with all interactions included. In separate analyses, PRL concentrations were compared in lactating and non-lactating queens for both species, and within DMRs for the effects of 12L:12D cycle versus dark/intermittent light (see methods above). The model was implemented using the R packages statmod (Giner and Smith, 2016) and tweedie (Dunn and Smyth, 2008).

## Results

Summary of anova statistics from between species GLM, with prolactin levels as the response and species, sex and reproductive status (breeding or non-breeding) as predictors (spec, species; d.f., degrees of freedom):

|                        | <b>d.f.</b> | <b>Sum Sq</b> | <b>Mean Sq</b> | <b>F value</b> | <b>Pr(&gt;F)</b>    |
|------------------------|-------------|---------------|----------------|----------------|---------------------|
| <b>spec</b>            | <b>1</b>    | <b>56799</b>  | <b>56799</b>   | <b>50.325</b>  | <b>1.51e-11 ***</b> |
| <b>sex</b>             | <b>1</b>    | <b>139</b>    | <b>139</b>     | <b>0.123</b>   | <b>0.726</b>        |
| <b>status</b>          | <b>1</b>    | <b>52</b>     | <b>52</b>      | <b>0.046</b>   | <b>0.831</b>        |
| <b>spec:sex</b>        | <b>1</b>    | <b>2</b>      | <b>2</b>       | <b>0.001</b>   | <b>0.970</b>        |
| <b>spec:status</b>     | <b>1</b>    | <b>762</b>    | <b>762</b>     | <b>0.675</b>   | <b>0.412</b>        |
| <b>sex:status</b>      | <b>1</b>    | <b>965</b>    | <b>965</b>     | <b>0.855</b>   | <b>0.356</b>        |
| <b>spec:sex:status</b> | <b>1</b>    | <b>417</b>    | <b>417</b>     | <b>0.370</b>   | <b>0.544</b>        |
| <b>Residuals</b>       | <b>236</b>  | <b>266362</b> | <b>1129</b>    |                |                     |

Summary of anova statistics from GLM, with prolactin levels as the response and lactating/non-lactating queens as predictors.

|                                       | <b>d.f.</b> | <b>Sum Sq</b> | <b>Mean Sq</b> | <b>F value</b> | <b>Pr(&gt;F)</b>  |
|---------------------------------------|-------------|---------------|----------------|----------------|-------------------|
| <b>queens\$spec</b>                   | <b>1</b>    | <b>6290</b>   | <b>6290</b>    | <b>12.83</b>   | <b>0.00112 **</b> |
| <b>queens\$lactating</b>              | <b>1</b>    | <b>5501</b>   | <b>5501</b>    | <b>11.22</b>   | <b>0.00209 **</b> |
| <b>queens\$spec:queens\$lactating</b> | <b>1</b>    | <b>3595</b>   | <b>3595</b>    | <b>7.33</b>    | <b>0.01079 *</b>  |
| <b>Residuals</b>                      | <b>32</b>   | <b>15692</b>  | <b>490</b>     |                |                   |

Summary of anova statistics from within DMR GLM, with prolactin levels as the response and Light:Dark cycle (cycle), sex and reproductive status (breeding or non-breeding) as predictors:

|                         | <b>d.f.</b> | <b>Sum Sq</b> | <b>Mean Sq</b> | <b>F value</b> | <b>Pr(&gt;F)</b> |
|-------------------------|-------------|---------------|----------------|----------------|------------------|
| <b>cycle</b>            | <b>1</b>    | <b>16</b>     | <b>16.24</b>   | <b>0.560</b>   | <b>0.4558</b>    |
| <b>sex</b>              | <b>1</b>    | <b>94</b>     | <b>93.93</b>   | <b>3.238</b>   | <b>0.0744</b>    |
| <b>status</b>           | <b>1</b>    | <b>90</b>     | <b>90.28</b>   | <b>3.112</b>   | <b>0.0802</b>    |
| <b>cycle:sex</b>        | <b>1</b>    | <b>65</b>     | <b>64.88</b>   | <b>2.236</b>   | <b>0.1373</b>    |
| <b>cycle:status</b>     | <b>1</b>    | <b>97</b>     | <b>97.11</b>   | <b>3.347</b>   | <b>0.0697</b>    |
| <b>sex:status</b>       | <b>1</b>    | <b>131</b>    | <b>131.43</b>  | <b>4.530</b>   | <b>0.0353 *</b>  |
| <b>cycle:sex:status</b> | <b>1</b>    | <b>40</b>     | <b>39.63</b>   | <b>1.366</b>   | <b>0.2447</b>    |
| <b>Residuals</b>        | <b>124</b>  | <b>3598</b>   | <b>29.01</b>   |                |                  |

Signif. codes: '\*\*\*' 0.001 '\*\*' 0.01 '\*' 0.05

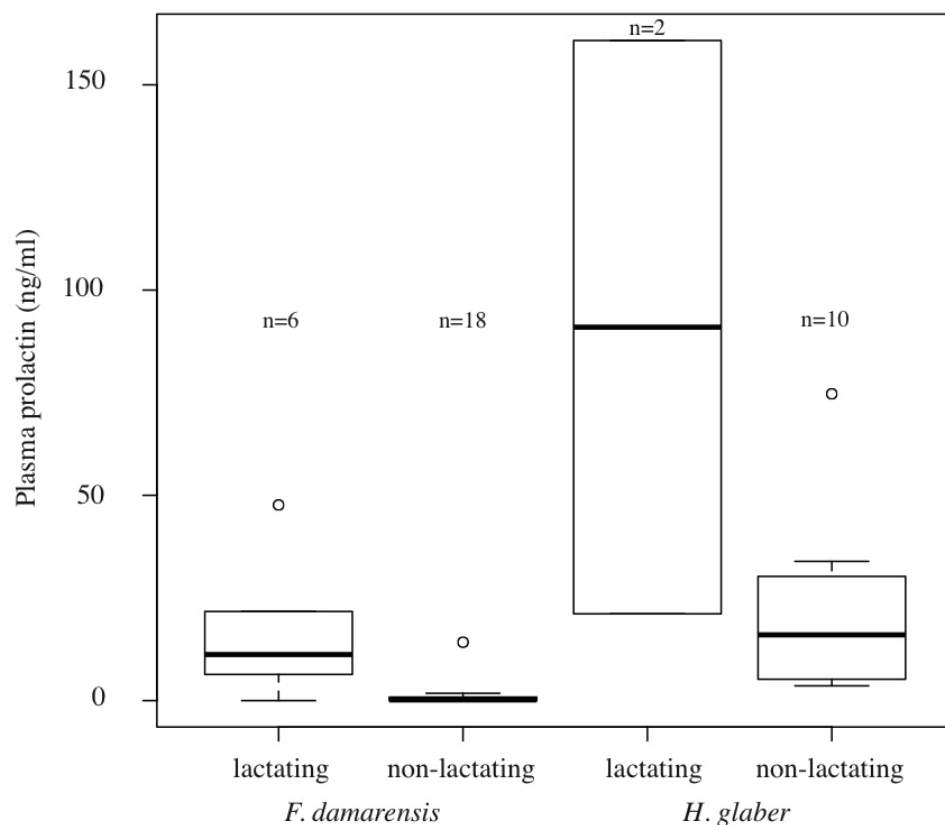

Figure S2: Plasma prolactin (PRL) concentrations for lactating and non-lactating Damaraland and naked mole-rats respectively. The box-plot midline is the median, with the upper and lower limits of the box being the third and first quartile (75th and 25th percentile) respectively. Whiskers extend up to 1.5 times the interquartile range from the top or bottom of the box to the furthest data point within that distance (beyond that distance, they are represented individually as points/'outliers').

## References

- Bennett NC, Jarvis JUM. 1988. The social structure and reproductive biology of colonies of the mole-rat *Cryptomys damarensis* (Rodentia, Bathyergidae). *J. Mammal.* **69**, 293–302.
- Carlson AA, Russell AF, Young AJ, Jordan NR, McNeilly AS, Parlow AF, Clutton-Brock T. 2006 Elevated prolactin levels immediately precede decisions to babysit by male meerkat helpers. *Horm. Behav.* 94–100. (doi:10.1016/j.yhbeh.2006.01.009)
- Dunn PK, Smyth GK 2008. Evaluation of Tweedie exponential dispersion model densities by Fourier inversion. *Statistics and Computing*, 18, 73–86. (doi: 10.1007/s1122200790396)
- Egli M, Leeners B, Tillmann, THC. 2010 Prolactin secretion patterns: basic mechanisms and clinical implications for reproduction. *Reproduction* **140**, 643–654. (doi: 10.1530/REP-10-0033)
- Faulkes CG, Abbott DH, Jarvis JUM 1990. Social suppression of ovarian cyclicity in wild colonies of naked mole-rats, *Heterocephalus glaber*. *J. Reprod. Fert.* **88**, 559–568.
- Giner G, Smyth GK 2016. statmod: probability calculations for the inverse Gaussian distribution. *R Journal* **8**, 339–351. (pinvgauss, qinvgauss, dinvgauss and rinvgauss functions)
- Oosthuizen MK, Cooper HM, Bennett NC 2003. Circadian rhythms of locomotor activity in solitary and social species of African mole-rats (Family: Bathyergidae). *J. Biol. Rhythms* 18, 481–490.
- Parkening TA, Collins TJ, Smith ER. 1980 Plasma and pituitary concentrations of LH, FSH and prolactin in aged female C57BL/6 mice. *J. Reprod. Fert.* 58, 377–86. (doi:10.1530/jrf.0.0580377)
- Tweedie MCK 1984. "An index which distinguishes between some important exponential families". In Ghosh, J.K.; Roy, J. *Statistics: Applications and New Directions*. Proceedings of the Indian Statistical Institute Golden Jubilee International Conference. Calcutta: Indian Statistical Institute. pp. 579–604.
- Zöttl M, Vullioud P, Mendonça R, Ticó MT, Gaynor D, Mitchell A, Clutton-Brock T. 2016. Differences in cooperative behavior among Damaraland mole rats are consequences of an age-related polyethism. *Proc. Natl Acad. Sci. USA* **113**, 10 382–10 387. (doi:10.1073/pnas.1607885113)

**Supplementary Table S1** Sample details and respective prolactin values (ng/mg plasma) for naked mole-rats. NBF: non-breeding females, NBM: non-breeding males, BM: breeding males.

| <i>Animal/<br/>sample<br/>No.</i> | <i>Sex/status</i> | <i>Body<br/>mass<br/>(g)</i> | <i>Prolactin<br/>(ng/ml)</i> | <i>Colony</i> | <i>Notes</i>        |
|-----------------------------------|-------------------|------------------------------|------------------------------|---------------|---------------------|
| 1                                 | NBM               | 45                           | 19.50                        | 1             |                     |
| 2                                 | NBM               | 49                           | 10.62                        | 1             |                     |
| 3                                 | NBF               | 72                           | 19.34                        | 1             |                     |
| 4                                 | NBF               | 60                           | 17.50                        | 1             |                     |
| 5                                 | NBF               | 40                           | 6.50                         | 1             |                     |
| 6                                 | NBM               | 54                           | 8.36                         | 1             |                     |
| 7                                 | NBF               | 53                           | 11.78                        | 1             |                     |
| 8                                 | NBF               | 67                           | 121.00                       | 1             |                     |
| 9                                 | NBF               | 40                           | 93.56                        | 1             |                     |
| 10                                | NBF               | 34                           | 19.24                        | 1             |                     |
| 11                                | NBM               | 55                           | 38.30                        | 1             |                     |
| 12                                | NBM               | 43                           | 22.32                        | 1             |                     |
| 13                                | NBM               | 40                           | 47.09                        | 1             |                     |
| 14                                | NBM               | 53                           | 12.68                        | 1             |                     |
| 15                                | NBF               | 47                           | 88.26                        | 1             |                     |
| 16                                | NBM               | 52                           | 9.42                         | 1             |                     |
| 17                                | NBM               | 38                           | 330.30                       | 1             |                     |
| 18                                | NBM               | 38                           | 176.10                       | 1             |                     |
| 19                                | NBM               | 37                           | 209.50                       | 1             |                     |
| 20                                | NBF               | 75                           | 173.60                       | 1             |                     |
| 21                                | NBF               | 63                           | 163.10                       | 1             |                     |
| 22                                | NBF               | 67                           | 44.10                        | 1             |                     |
| 23                                | NBM               | 66                           | 20.48                        | 1             |                     |
| 24                                | NBM               | 59                           | 28.62                        | 1             |                     |
| 25                                | NBM               | 46                           | 32.34                        | 1             |                     |
| 26                                | NBF               | 41                           | 46.72                        | 1             |                     |
| 27                                | NBF               | 44                           | 39.72                        | 1             |                     |
| 28                                | NBF               | 36                           | 39.34                        | 1             |                     |
| 29                                | NBF               | 49                           | 32.72                        | 1             |                     |
| 30                                | NBM               | 40                           | 29.06                        | 1             |                     |
| 31                                | NBF               | 44                           | 11.44                        | 2             |                     |
| 32                                | NBF               | 57                           | 31.48                        | 2             |                     |
| 33                                | Queen             | 73                           | 9.02                         | 2             | 44/72 days pregnant |
| 34                                | NBM               | 56                           | 4.74                         | 2             |                     |
| 35                                | NBF               | 45                           | 13.70                        | 2             |                     |
| 36                                | NBF               | 46                           | 7.06                         | 2             |                     |
| 37                                | NBF               | 43                           | 12.74                        | 2             |                     |
| 38                                | NBF               | 47                           | 6.02                         | 2             |                     |
| 39                                | NBM               | 52                           | 79.54                        | 2             |                     |
| 40                                | NBM               | 49                           | 5.96                         | 2             |                     |
| 41                                | NBM               | 46                           | 13.07                        | 2             |                     |
| 42                                | NBF               | 40                           | 9.46                         | 2             |                     |

| <i>Animal/<br/>sample<br/>No.</i> | <i>Sex/status</i> | <i>Body<br/>mass<br/>(g)</i> | <i>Prolactin<br/>(ng/ml)</i> | <i>Colony</i> | <i>Notes</i>                    |
|-----------------------------------|-------------------|------------------------------|------------------------------|---------------|---------------------------------|
| 1                                 | Queen             | 55                           | 21.14                        | 3             | 23 days post-partum (lactating) |
| 2                                 | NBF               | 76.86                        | 44.2                         | 3             |                                 |
| 3                                 | BM                | 65.31                        | 7.24                         | 3             |                                 |
| 4                                 | NBF               | 73.3                         | 31.36                        | 3             |                                 |
| 5                                 | NBF               | 70.9                         | 10.4                         | 3             |                                 |
| 6                                 | NBF               | 49.1                         | 21.64                        | 3             |                                 |
| 7                                 | NBM               | 62.3                         | 7.36                         | 3             |                                 |
| 8                                 | NBM               | 45.75                        | 40.68                        | 3             |                                 |
| 9                                 | NBF               | 45.5                         | 0                            | 3             |                                 |
| 10                                | NBM               | 43.3                         | 0                            | 3             |                                 |
| 11                                | NBM               | 46.4                         | 6.48                         | 3             |                                 |
| 12                                | NBF               | 43.3                         | 25.12                        | 3             |                                 |
| 13                                | NBM               | 36.1                         | 87.04                        | 3             |                                 |
| 14                                | NBF               | 36.9                         | 50.78                        | 3             |                                 |
| 15                                | NBF               | 41                           | 0                            | 3             |                                 |
| 16                                | NBM               | 36.3                         | 4.34                         | 3             |                                 |
| 17                                | NBM               | 36                           | 6.94                         | 3             |                                 |
| 18                                | NBM               | 35.6                         | 5.84                         | 3             |                                 |
| 19                                | NBF               | 37.1                         | 0                            | 3             |                                 |
| 20                                | NBM               | 37.4                         | 0                            | 3             |                                 |
| 21                                | NBM               | 40.9                         | 0                            | 3             |                                 |
| 22                                | NBM               | 28.9                         | 0                            | 3             |                                 |
| 23                                | NBM               | 35.3                         | 4.04                         | 3             |                                 |
| 24                                | NBF               | 35.2                         | 0                            | 3             |                                 |
| 25                                | NBM               | 32.7                         | 5.6                          | 3             |                                 |
| 26                                | NBM               | 28.2                         | 0                            | 3             |                                 |
| 1                                 | BM                | 64                           | 6.44                         | 3a            |                                 |
| 2                                 | Queen             | 60                           | 5.2                          | 3a            | 45/72 days pregnant             |
| 3                                 | NBM               | 55.2                         | 6.04                         | 3a            |                                 |
| 4                                 | NBF               | 37                           | 9.36                         | 3a            |                                 |
| 5                                 | NBM               | 58                           | 15.62                        | 3a            |                                 |
| 6                                 | NBM               | 49                           | 9.3                          | 3a            |                                 |
| 7                                 | NBF               | 37                           | 8.54                         | 3a            |                                 |
| 8                                 | NBM               | 43                           | 0                            | 3a            |                                 |
| 9                                 | NBF               | 37                           | 18.76                        | 3a            |                                 |
| 10                                | NBF               | 45                           | 7.36                         | 3a            |                                 |
| 11                                | NBF               | 33                           | 5.26                         | 3a            |                                 |
| 12                                | NBM               | 42                           | 18.34                        | 3a            |                                 |
| 1                                 | BM                | 65.9                         | 47.92                        | 3a            |                                 |
| 2                                 | Queen             | 55.2                         | 160.8                        | 3a            | lactating                       |
| 3                                 | NBM               | 64.7                         | 16.14                        | 3a            |                                 |
| 4                                 | NBF               | 51                           | 27.58                        | 3a            |                                 |

| <i>Animal/<br/>sample<br/>No.</i> | <i>Sex/status</i> | <i>Body<br/>mass<br/>(g)</i> | <i>Prolactin<br/>(ng/ml)</i> | <i>Colony</i> | <i>Notes</i> |
|-----------------------------------|-------------------|------------------------------|------------------------------|---------------|--------------|
| 5                                 | NBM               | 44.4                         | 25.5                         | 3a            |              |
| 6                                 | NBM               | 52.2                         | 61.84                        | 3a            |              |
| 7                                 | NBF               | 40.3                         | 68.58                        | 3a            |              |
| 8                                 | NBF               | 38.1                         | 16.14                        | 3a            |              |
| 9                                 | NBM               | 52.4                         | 26.2                         | 3a            |              |
| 10                                | NBM               | 52.2                         | 21.4                         | 3a            |              |
| 11                                | NBF               | 38.1                         | 6.52                         | 3a            |              |
| 12                                | NBM               | 37.3                         | 53.28                        | 3a            |              |
| 13                                | NBM               | 40.6                         | 10.36                        | 3a            |              |
| 14                                | NBF               | 40.3                         | 9.52                         | 3a            |              |
| 15                                | NBM               | 41.4                         | 8.98                         | 3a            |              |
| 16                                | NBM               | 39.3                         | 7.78                         | 3a            |              |
| 17                                | NBM               | 38.2                         | 15.12                        | 3a            |              |
| 18                                | NBM               | 30.2                         | 10.4                         | 3a            |              |
| 19                                | NBM               | 29.3                         | 45.12                        | 3a            |              |
| 5.01                              | Queen             | 61.7                         | 23.02                        | 5             | pregnant     |
| 5.02                              | BM                | 48.9                         | 29.1                         | 5             |              |
| 628                               | Queen             | 45.5                         | 4.66                         | 11a           | Not pregnant |
| 827                               | Queen             | 57.2                         | 6.72                         | Omega         | Not pregnant |
| 527                               | Queen             | 44.8                         | 30.26                        | 11c           | Not pregnant |
| 881                               | Queen             | 57.5                         | 33.92                        | B             | Not pregnant |
| 297                               | Queen             | 59.1                         | 23.20                        | G             | Not pregnant |
| 52                                | Queen             | 52                           | 74.72                        | 11b           | Not pregnant |
| 555                               | BM                | 36.1                         | 9.74                         | 11b           |              |
| 578                               | BM                | 46.6                         | 3.92                         | Omega         |              |
| 107                               | Queen             | 32                           | 3.60                         | 17a           | Not pregnant |
| 118                               | BM                | 31                           | 7.04                         | 17a           |              |
| 33                                | NBM               | 56                           | 90.94                        | B             |              |

**Supplementary Table S2** Sample details and respective prolactin values (ng/mg plasma) for Damaraland mole-rats. NBF: non-breeding females, NBM: non-breeding males, BM: breeding males. Colony names in **green** text signify animals housed on a 12L:12D photoperiod, while those in **blue** were from the KRC where colonies were kept in the dark, with lights-on while daily husbandry and sampling was conducted.

| <i>Animal/<br/>sample No.</i> | <i>Sex/status</i> | <i>Body mass<br/>(g)</i> | <i>Prolactin<br/>(ng/ml)</i> | <i>Colony</i> | <i>Notes</i> |
|-------------------------------|-------------------|--------------------------|------------------------------|---------------|--------------|
| 1.1                           | Queen             | 119                      | <b>0.856</b>                 | Winton1       | non pregnant |
| 1.2                           | BM                | 194                      | 0.389                        | Winton1       |              |
| 1.3                           | NBF               | 59                       | 0                            | Winton1       |              |
| 2.1                           | Queen             | 116                      | 0                            | Winton2       | non pregnant |
| 2.2                           | NBF               | 84                       | 0.878                        | Winton2       |              |
| 2.4                           | BM                | 133                      | 1.188                        | Winton2       |              |
| 2.5                           | NBF               | 102                      | 0                            | Winton2       |              |
| 2.6                           | NBF               | 120                      | 0                            | Winton2       |              |
| 2.7                           | NBM               | 106                      | 0                            | Winton2       |              |
| 3.1                           | BM                | 143                      | 0                            | Winton3       |              |
| 3.2                           | Queen             | 95                       | 0.569                        | Winton3       | non pregnant |
| 3.3                           | NBF               | 80                       | 0                            | Winton3       |              |
| 3.4                           | NBM               | 88                       | 0.59                         | Winton3       |              |
| 5.1                           | NBM               | 98                       | 0                            | Winton5       |              |
| 5.2                           | NBM               | 70                       | 0                            | Winton5       |              |
| 5.3                           | BM                | 190                      | 0                            | Winton5       |              |
| 5.4                           | Queen             | 136                      | 0                            | Winton5       | non pregnant |
| 5.5                           | NBF               | 65                       | 0                            | Winton5       |              |
| 6.1                           | Queen             | 129                      | 0                            | Winton6       | non pregnant |
| 6.2                           | BM                | 149                      | 0                            | Winton6       |              |
| 7.1                           | BM                | 186                      | 0                            | Winton7       |              |
| 7.2                           | Queen             | 145                      | 0.483                        | Winton7       | non pregnant |
| 8.1                           | NBF               | 120                      | 0                            | Winton8       |              |
| 8.2                           | NBM               | 128                      | 0.474                        | Winton8       |              |
| 8.3                           | NBM               | 90                       | 0                            | Winton8       |              |
| 8.4                           | BM                | 154                      | 0                            | Winton8       |              |
| 8.5                           | BM                | 188                      | 0                            | Winton8       |              |
| 8.6                           | NBF               | 81                       | 0                            | Winton8       |              |
| 8.7                           | Queen             | 112                      | 0.332                        | Winton8       | non pregnant |
| 8.8                           | NBM               | 118                      | 0                            | Winton8       |              |
| 9.1                           | NBM               | 138                      | 0                            | Winton9       |              |
| 9.2                           | NBF               |                          | 0                            | Winton9       |              |
| 9.3                           | NBM               | 81                       | 0.336                        | Winton9       |              |
| 9.4                           | NBF               | 119                      | 0                            | Winton9       |              |
| 9.5                           | NBM               | 61                       | 0                            | Winton9       |              |
| 9.6                           | NBM               | 47                       | 0.378                        | Winton9       |              |
| 9.7                           | NBM               | 144                      | 0                            | Winton9       |              |
| 9.8                           | BM                | 172                      | 0                            | Winton9       |              |
| 9.9                           | NBM               | 80                       | 0.396                        | Winton9       |              |
| 9.11                          | NBF               | 84                       | 0                            | Winton9       |              |



| <i>Animal/<br/>sample No.</i> | <i>Sex/status</i> | <i>Body mass<br/>(g)</i> | <i>Prolactin<br/>(ng/ml)</i> | <i>Colony</i> | <i>Notes</i>     |
|-------------------------------|-------------------|--------------------------|------------------------------|---------------|------------------|
| 9.12                          | Queen             | 126                      | 0                            | Winton9       | non pregnant     |
| 9.13                          | NBM               | 106                      | 0                            | Winton9       |                  |
| 11.1                          | NBM               | 96                       | 0                            | Winton11      |                  |
| 11.2                          | NBF               | 47                       | 0                            | Winton11      |                  |
| 11.3                          | BM                | 169                      | 0                            | Winton11      |                  |
| 11.4                          | NBM               | 155                      | 0                            | Winton11      |                  |
| 11.5                          | Queen             | 121                      | 1.43                         | Winton11      | non pregnant     |
| 11.6                          | NBM               | 67                       | 0                            | Winton11      |                  |
| 11.7                          | NBF               | 114                      | 0                            | Winton11      |                  |
| 11.8                          | NBM               | 106                      | 0                            | Winton11      |                  |
| 11.9                          | NBM               | 118                      | 0.512                        | Winton11      |                  |
| 11.10                         | NBM               | 77                       | 0                            | Winton11      |                  |
| 11.11                         | NBF               | 74                       | 0                            | Winton11      |                  |
| 11.12                         | NBM               | 70                       | 0                            | Winton11      |                  |
| 11.13                         | NBF               | 49                       | 0                            | Winton11      |                  |
| 5                             | Queen             | 130                      | 8.55                         | Tswalu1       | 5 days lactating |
| 8                             | Queen             | 142                      | 21.71                        | Tswalu2       | lactating        |
| 9                             | Queen             | 138                      | 13.89                        | Tswalu3       | 9 days lactating |
| 10                            | Queen             | 119                      | 6.375                        | Tswalu4       | lactating        |
| 15                            | Queen             | 157                      | 47.65                        | Tswalu5       | 7 days lactating |
| G3F009                        | Queen             | 170                      | 14.23                        | Crick         | No Lact          |
| NOM003                        | NBM               | 85                       | 0                            | Nowak         |                  |
| NOM004                        | NBM               | 91                       | 0                            | Nowak         |                  |
| NOF002                        | NBF               | 82                       | 0                            | Nowak         |                  |
| G13F012                       | NBF               | 74                       | 0                            | G13           |                  |
| G5F004                        | Queen             | 90                       | 0                            | Grunenthal    | No Lact          |
| JA5M002                       | BM                | 91                       | 0                            | Grunenthal    |                  |
| SAF001                        | NBF               | 93                       | 23.875                       | Sappolsky     |                  |
| SAM002                        | NBM               | 132                      | 0                            | Sapplosky     |                  |
| SAF004                        | NBF               | 53                       | 0                            | Sappolsky     |                  |
| L6M009                        | NBM               | 142                      | 0                            | L6            |                  |
| JRM001                        | NBM               | 154                      | 0                            | Jarvis        |                  |
| L7F007                        | Queen             | 163                      | 0                            | Aristotle     | early pregnant   |
| G10M017                       | BM                | 173                      | 0                            | Aristotle     |                  |
| L7F009                        | NBF               | 135                      | 0                            | Aristotle     |                  |
| JA1M001                       | BM                | 140                      | 0                            | Lorenz        |                  |
| G1F002                        | Queen             | 126                      | 0.835                        | Lorenz        | non pregnant?    |
| G1F012                        | Queen             | 151                      | 0                            | Burda         | non pregnant?    |
| G7M008                        | BM                | 160                      | 0                            | Burda         |                  |
| KR7F010                       | Queen             | 119                      | 1.785                        | Hermes        | non pregnant?    |
| BO50M005                      | BM                | 116                      | 0                            | Hermes        |                  |
| G10M003                       | NBM               | 163                      | 20.225                       | G10           |                  |
| G10M002                       | NBM               | 170                      | 0                            | G10           |                  |
| L2M002                        | NBM               | 214                      | 0                            | L2            |                  |

| <i>Animal/<br/>sample No.</i> | <i>Sex/status</i> | <i>Body mass<br/>(g)</i> | <i>Prolactin<br/>(ng/ml)</i> | <i>Colony</i> | <i>Notes</i>  |
|-------------------------------|-------------------|--------------------------|------------------------------|---------------|---------------|
| L2M001                        | NBM               | 156                      | 0                            | L2            |               |
| L3M001                        | NBM               | 189                      | 0                            | L2            |               |
| FAF001                        | NBF               | 63                       | 0                            | Faulkes       |               |
| G4F010                        | Queen             | 109                      | 0.88                         | Faulkes       |               |
| Z3M007                        | NBM               | 144                      | 11.995                       | Faulkes       |               |
| F2F002                        | Queen             | 95                       | 0                            | West          | non pregnant? |
| JA1M003                       | BM                | 115                      | 0.885                        | West          |               |
| L2F017                        | NBF               | 42                       | 0                            | L2            |               |
| L2M016                        | NBM               | 54                       | 0                            | L2            |               |
| G10F026                       | NBF               | 63                       | 1.035                        | G10           |               |
| BUF001                        | NBF               | 74                       | 0                            | Burda         |               |
| G4F019                        | NBF               | 55                       | 0                            | G4            |               |
| G4M017                        | NBM               | 52                       | 0                            | G4            |               |
| G4F020                        | NBF               | 58                       | 0                            | G4            |               |
| G4M018                        | NBM               | 64                       | 0                            | G4            |               |
| G4F016                        | NBF               | 89                       | 0                            | G4            |               |
| CRF004                        | NBF               | 76                       | 0                            | Crick         |               |
| CRF005                        | NBF               | 81                       | 0                            | Crick         |               |
| G11F011                       | NBF               | 132                      | 0                            | G11           |               |
| G11F010                       | NBF               | 117                      | 0                            | G11           |               |
| G11M004                       | NBM               | 170                      | 0                            | G11           |               |
| G11F015                       | NBF               | 109                      | 0                            | G11           |               |
| G11F003                       | NBF               | 107                      | 0                            | G11           |               |
| G11F017                       | NBF               | 77                       | 0.84                         | G11           |               |
| G11M018                       | NBM               | 75                       | 0                            | G11           |               |
| G11M012                       | NBM               | 130                      | 0                            | G11           |               |
| G11M016                       | NBM               | 144                      | 0                            | G11           |               |
| G11M008                       | NBM               | 165                      | 1.08                         | G11           |               |
| G11F007                       | Queen             | 147                      | 0                            | G11           | lactating     |
| L2F004                        | NBF               | 154                      | 0                            | L2            |               |
| L3M001                        | NBM               | 207                      | 0                            | L2            |               |
| L2M001                        | BM                | 165                      | 0                            | L2            |               |
| L2F017                        | NBF               | 56                       | 0                            | L2            |               |
| L2M002                        | BM                | 212                      | 0                            | L2            |               |
| L3F0003                       | NBF               | 153                      | 0                            | L2            |               |
| L2M016                        | NBM               | 65                       | 0                            | L2            |               |
| L2M012                        | NBM               | 133                      | 0                            | L2            |               |
| L2M003                        | NBM               | 186                      | 0                            | L2            |               |
| G1M025                        | NBM               | 197                      | 0                            | G1            |               |
| G1F010                        | Queen             | 156                      | 0                            | G1            |               |
| G1F022                        | NBF               | 42                       | 0                            | G1            |               |
| G1M008                        | BM                | 191                      | 0                            | G1            |               |

| <i>Animal/<br/>sample No.</i> | <i>Sex/status</i> | <i>Body mass<br/>(g)</i> | <i>Prolactin<br/>(ng/ml)</i> | <i>Colony</i> | <i>Notes</i> |
|-------------------------------|-------------------|--------------------------|------------------------------|---------------|--------------|
| G1F021                        | NBF               | 98                       | 0                            | G1            |              |
| G1F014                        | NBF               | 150                      | 0                            | G1            |              |
| G1M004                        | BM                | 181                      | 0                            | G1            |              |
| G1F025                        | NBF               | 51                       | 0                            | G1            |              |
| G1M017                        | NBM               | 168                      | 0                            | G1            |              |
| G1M026                        | NBM               | 53                       | 0                            | G1            |              |
